# Supplementary material for: The Potential of Purple Waxy Corn Cob (Zea mays L.) Extract Loaded-Sericin Hydrogel for Anti-Hyperpigmentation, UV Protection and Anti-Aging Properties as Topical Product Applications
Source: MDPI journal article supplement (doi:10.3390/ph16010035), 2022-12-27
Supplement: s1 [file s1]

## Supplementary materials

**Table S1:** Structure of anthocyanin derivatives and calculated molecular ion and fragment ion for MS detection.

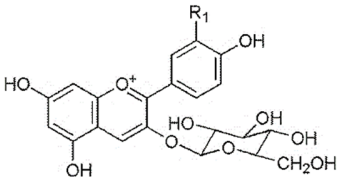

| Anthocyanin                       | R <sub>1</sub>   | [M+H] <sup>+</sup><br>(m/z) | Fragments ions<br>(m/z) |
|-----------------------------------|------------------|-----------------------------|-------------------------|
| Cyanidin-3-O-glucoside (C3G)      | OH               | 449                         | 287                     |
| Peonidin-3-O-glucoside (Pn3G)     | OCH <sub>3</sub> | 463                         | 301                     |
| Pelagonidine-3-O-glucoside (Pg3G) | H                | 433                         | 271                     |

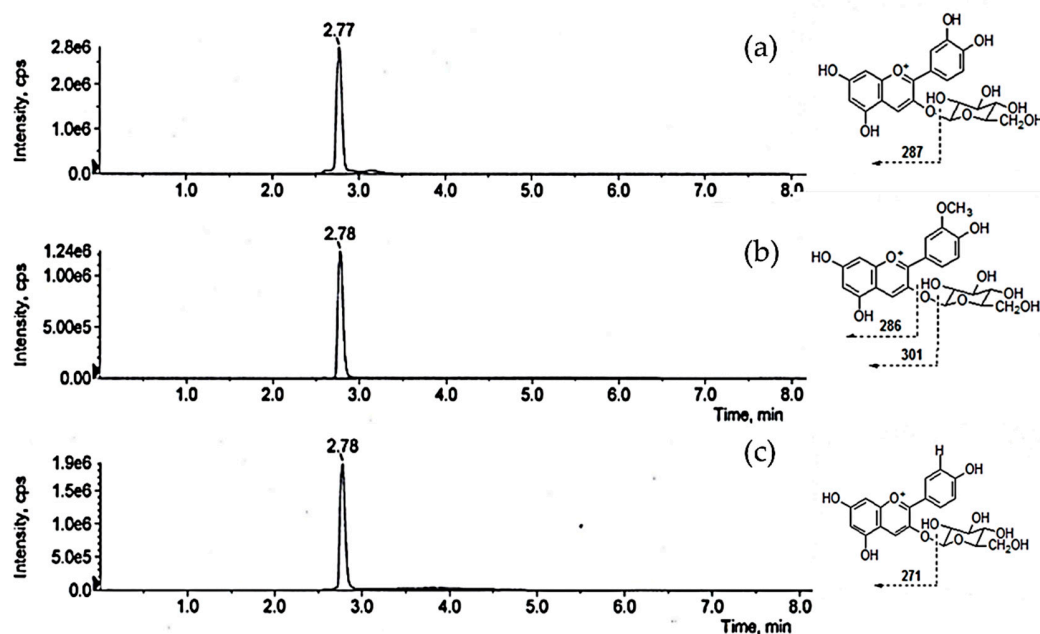

**Figure S1:** LC-MS/MS chromatogram of anthocyanin from purple corn cob 1  $\mu\text{g/mL}$  extracted by computer software to C3G (449/287) (a), Pn3G (463/301) (b), Pg3G (433/271) (c), retention time 2.77-2.78 min.

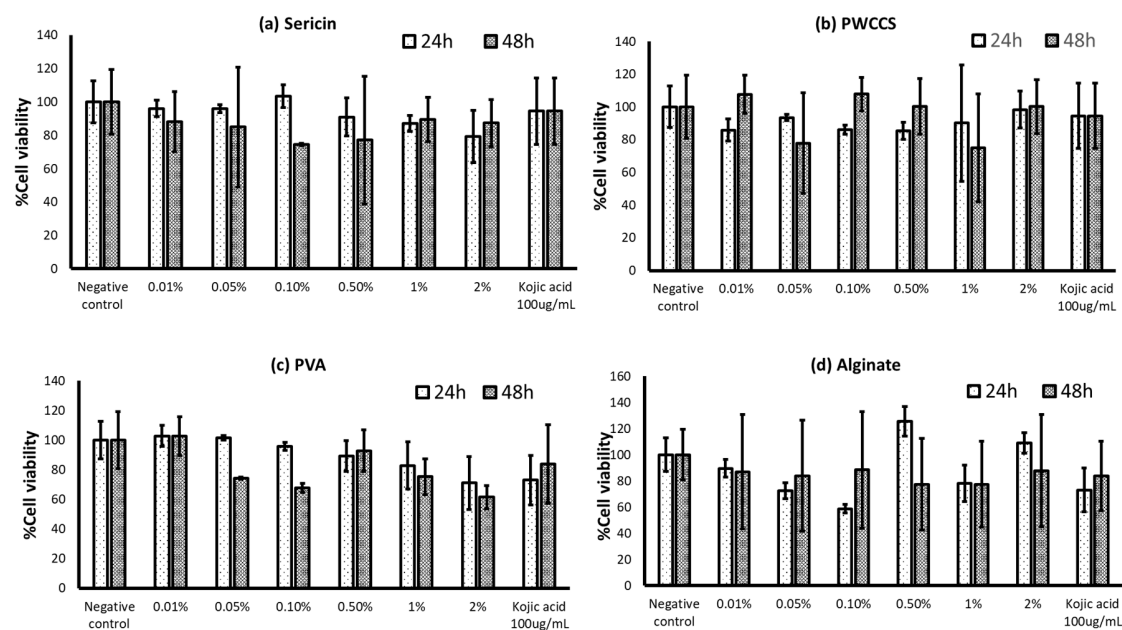

**Figure S2:** Effects of sericin, PWCCS, PVA and alginate on cell viability of B16F10 cells after treatment for 24, 48 h.

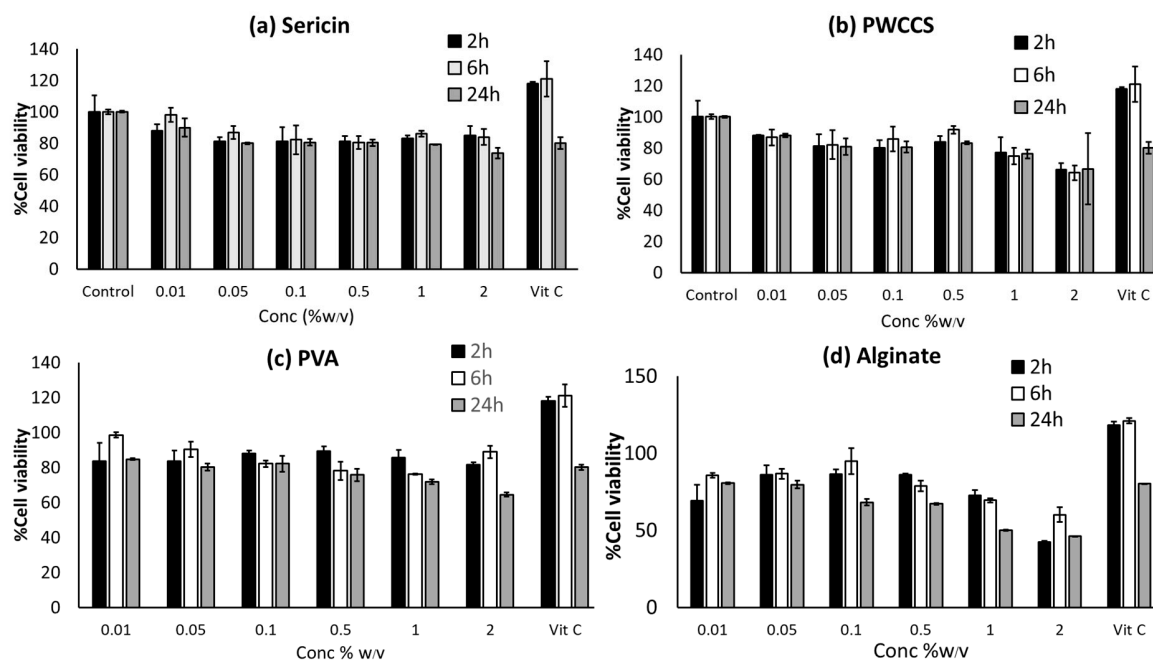

**Figure S3:** Effects of sericin, PWCCS, PVA and alginate compared with ascorbic acid C 25 µg /mL (Vit C) for cell viability on HaCaT cells after treatment for 2, 6 and 24 h. Data represent the mean  $\pm$  SEM of three replicates.

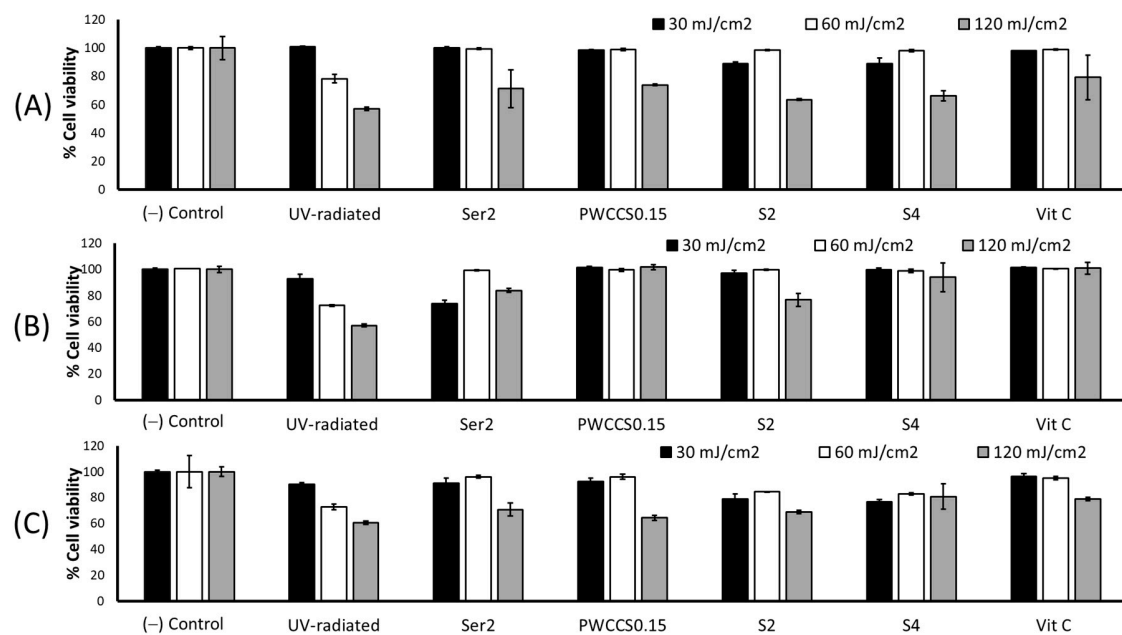

**Figure S4:** Effects of UV-irradiation for various time of formulation pretreatment of 2%sericin (Ser2), 0.15%PWCCS (PWCCS0.15), formulations (S2 and S4) and ascorbic acid 25 µg/mL (Vit C) on HaCaT cells (A) 2 h pretreatment formulations (B) 6 h pretreatment formulations and (C) 24 h pretreatment formulations. Data represents the mean ± SEM of three replicates.

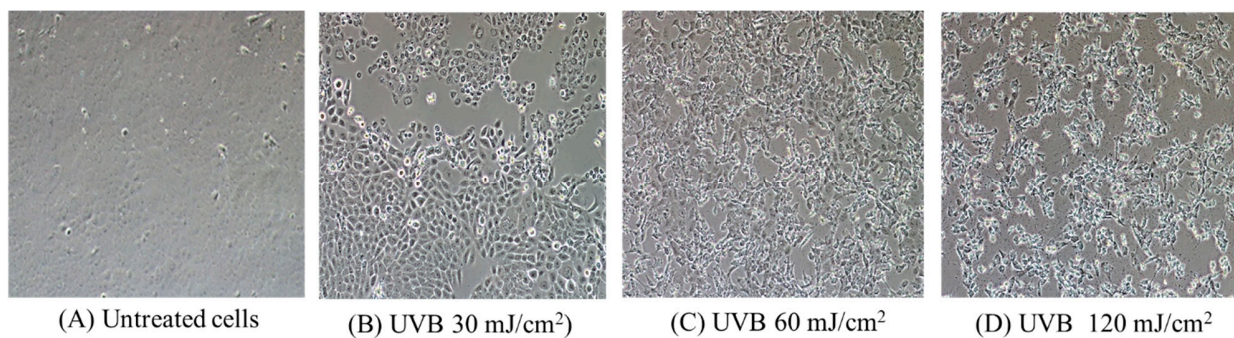

**Figure S5:** Morphology of UVB irradiation on HaCaT cells: (A) Untreated cells, (B) Cells irradiated with UVB 30 mJ/cm², (C) Cells irradiated with UVB 60 mJ/cm², (D) Cells irradiated with UVB 120 mJ/cm².

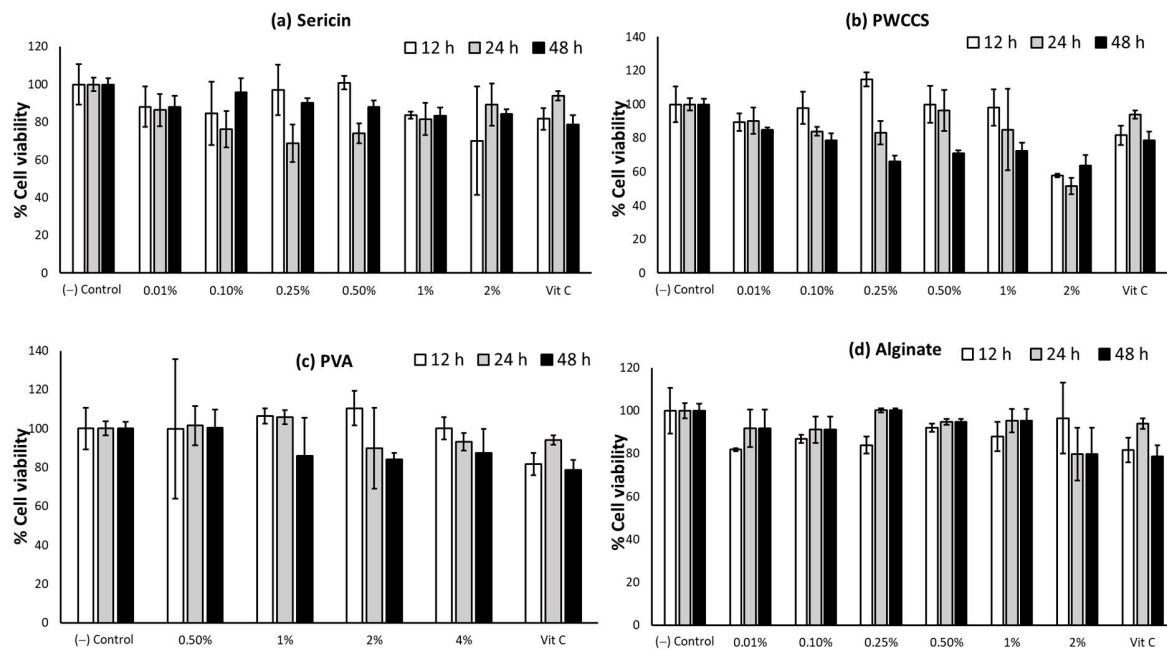

**Figure S6:** Effects of sericin, PWCCS, Alginate, and PVA on cell viability of NHDF cells after 12, 24, and 48 h.

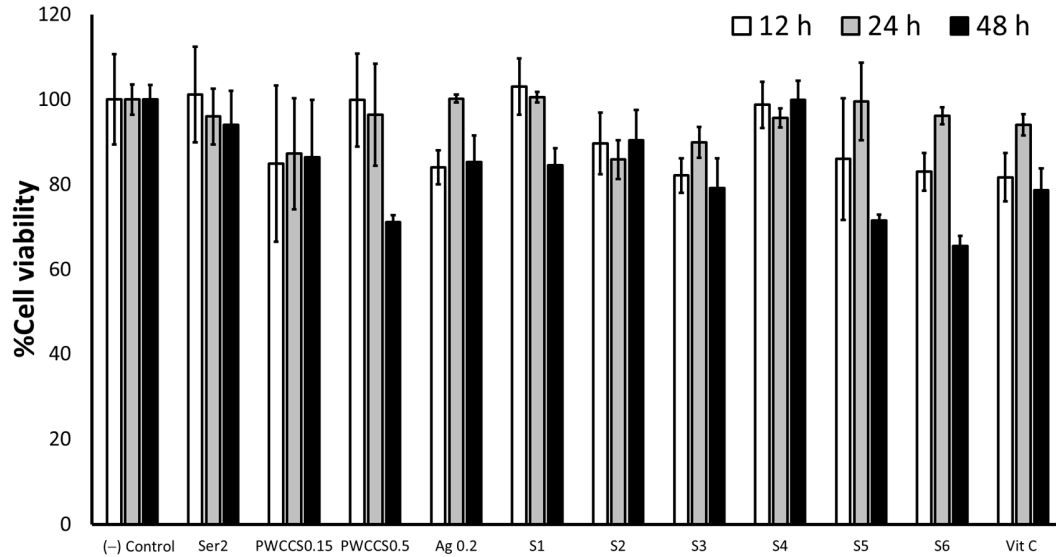

**Figure S7:** Viability of NHDF cells exposed to 2%sericin (Ser2), 0.15%PWCCS (PWCCS0.15), 0.2%alginate (Ag0.2), 25  $\mu$ g /mL ascorbic acid (Vit C), formulations S1-S6 for 12, 24 and 48 h. Data represent the mean  $\pm$  SEM of three replicates.
